# Supplementary material
Source: MDPI journal article supplement (https://www.mdpi.com/2226-4310/11/3/169)
Supplement: s1 [file s1]

Archive with 1 entries (1 files):
- aerospace-2775868-supplementary.pdf
